# Supplementary material
Source: Springer Nature journal article supplement (https://www.springermedizin.de/resource/supplementary/12998_2012_75_MOESM1_ESM.pdf/9680188)
Supplement: MOESM1 [file 9680188]

1. How many Chiropractic outpatient clinics does your College / University operate?

2. Approximately what percentage of your total treated patient population (excluding student patients) has limited English language proficiency?

3. Approximately what percentage of your patients with limited English language proficiency (excluding student patients) primarily speak:

|                 |                      |
|-----------------|----------------------|
|                 | <input type="text"/> |
| Portuguese      | <input type="text"/> |
| French          | <input type="text"/> |
| Chinese         | <input type="text"/> |
| Japanese        | <input type="text"/> |
| Korean          | <input type="text"/> |
| Other (specify) | <input type="text"/> |
| Other (specify) | <input type="text"/> |
| Other (specify) | <input type="text"/> |

4. Do you provide accommodation(s) for patient language issues?

- Yes
- No

5. What types of accommodations are made for the patients with limited English language proficiency seen in your clinic(s)?

- Professional Translator
- Student / Available Staff Translator
- Language specific forms
- Language specific educational material
- Language specific signage
- Language specific presentations and community outreach
- No accommodations are provided

Other (please specify)

6. Do you employ a language specific "Consent to Treat" form?

- Yes
- No
- We do not use a consent to treat form

7. Are you satisfied with the current procedures in your clinics to accommodate patients with limited English language proficiency?

- |                       |                       |                                           |                       |                          |
|-----------------------|-----------------------|-------------------------------------------|-----------------------|--------------------------|
| <b>Very Satisfied</b> | <b>Satisfied</b>      | <b>Neither satisfied nor dissatisfied</b> | <b>Dissatisfied</b>   | <b>Very Dissatisfied</b> |
| <input type="radio"/> | <input type="radio"/> | <input type="radio"/>                     | <input type="radio"/> | <input type="radio"/>    |

8. Do you currently have written policies and / or procedures for accommodating patients with limited English language proficiency?

- Yes
- No

9. If your answer to question 8 is no, do you have plans to develop written policies and / or procedures?

- Yes
- No

10. Comments
